# Supplementary material for: Epigenetic silencing of miR-145-5p contributes to brain metastasis
Source: PubMed Central journal article supplement (PMC4742098; doi:10.18632/oncotarget.5930), 2015-09-30
Supplement: oncotarget-06-35183-s001.pdf [file oncotarget-06-35183-s001.pdf]

# Epigenetic silencing of miR-145-5p contributes to brain metastasis

## Supplementary Material

A

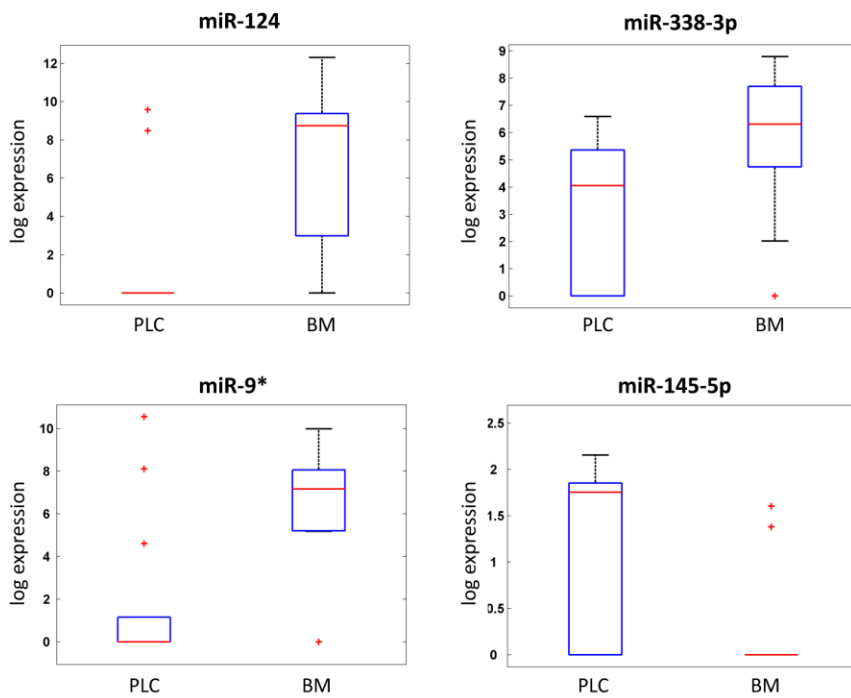

B

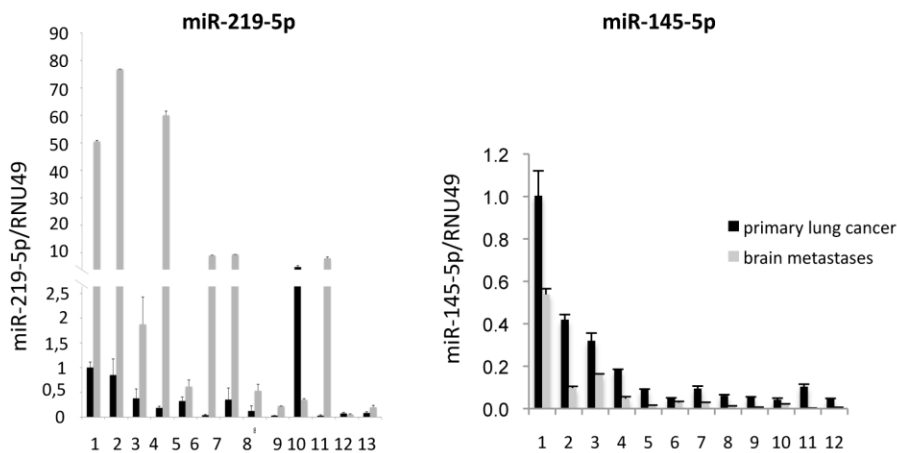

## Supplementary figure S1.

A) Supervised statistical test of the significance level of the difference between signal distributions of 4 miRNAs between the 8 miRNAs of the signature within the 13 matched samples analyzed (PLC= primary lung cancer; BM= brain metastases). B) qRT-PCR validation of 2 miRNAs of the signature.

**A**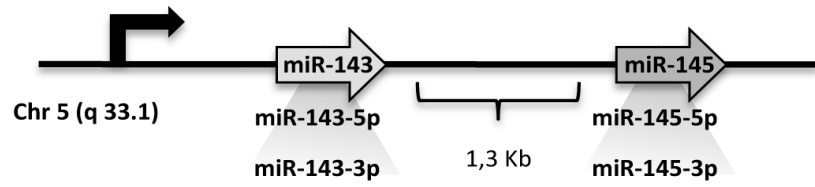**B**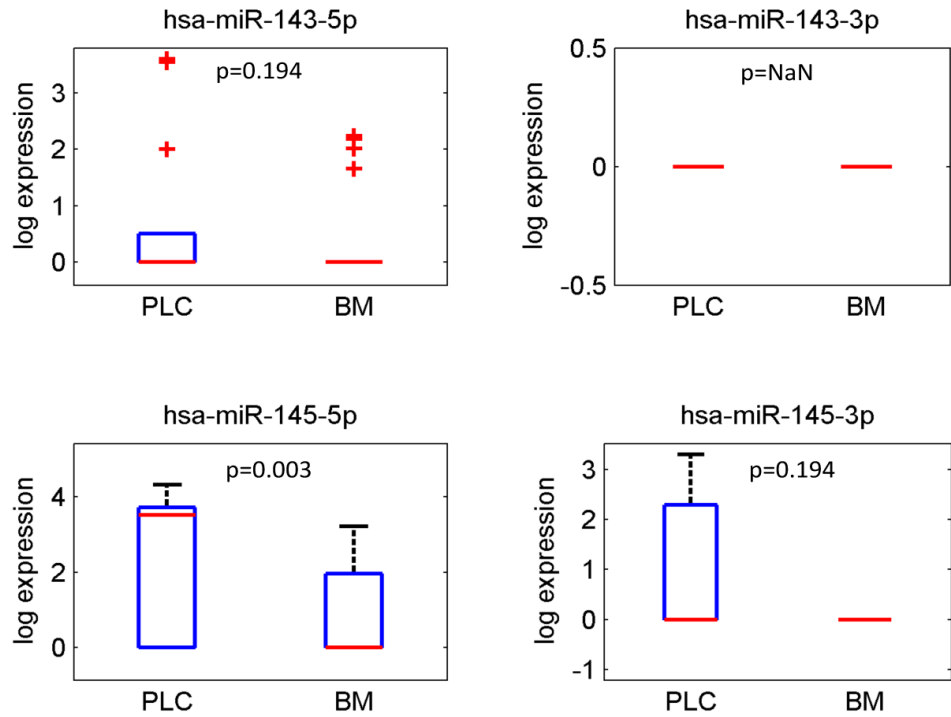**Supplementary figure S2.**

**A)** Schematic representation of miR-143/miR-145 cluster. **B)** Microarray signal distributions of miR-143-5p, miR-143-3p, miR-145-5p and miR-145-3p.

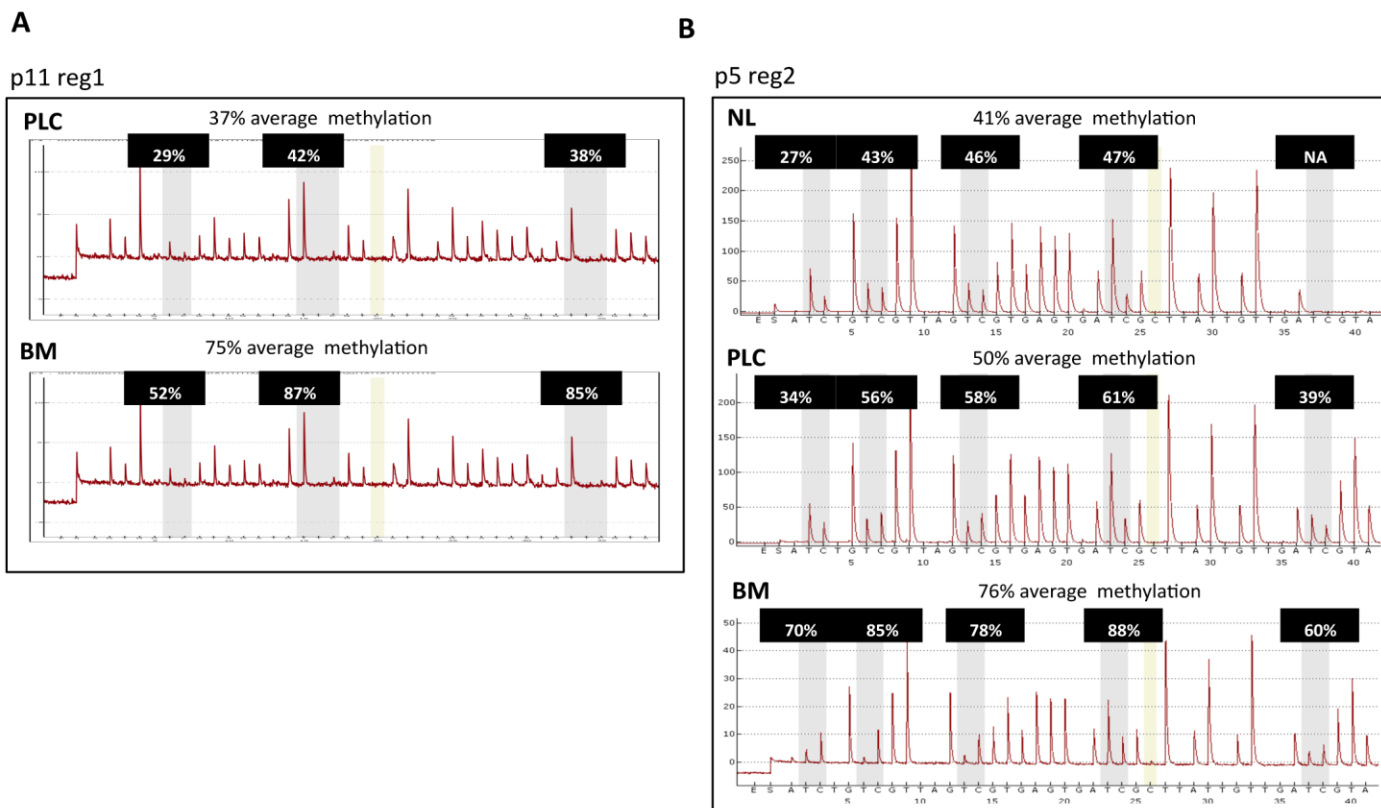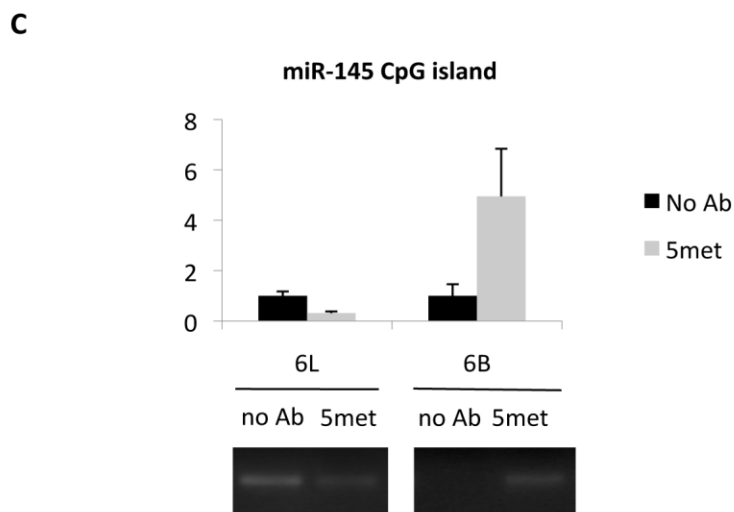

**Supplementary figure S3.**

**A-B)** Pyrosequencing analysis of miR-145-5p CpG island methylation status in 2 representative patients of the casuistry (NL= normal lung; PLC= primitive lung cancer; BM= brain metastases; p= patient; reg1= region 1; reg2= region 2). **C)** meDIP analysis of miR-145-5p gene CpG island methylation status in patient 6 (6L= primary lung cancer; 6B= brain metastases).

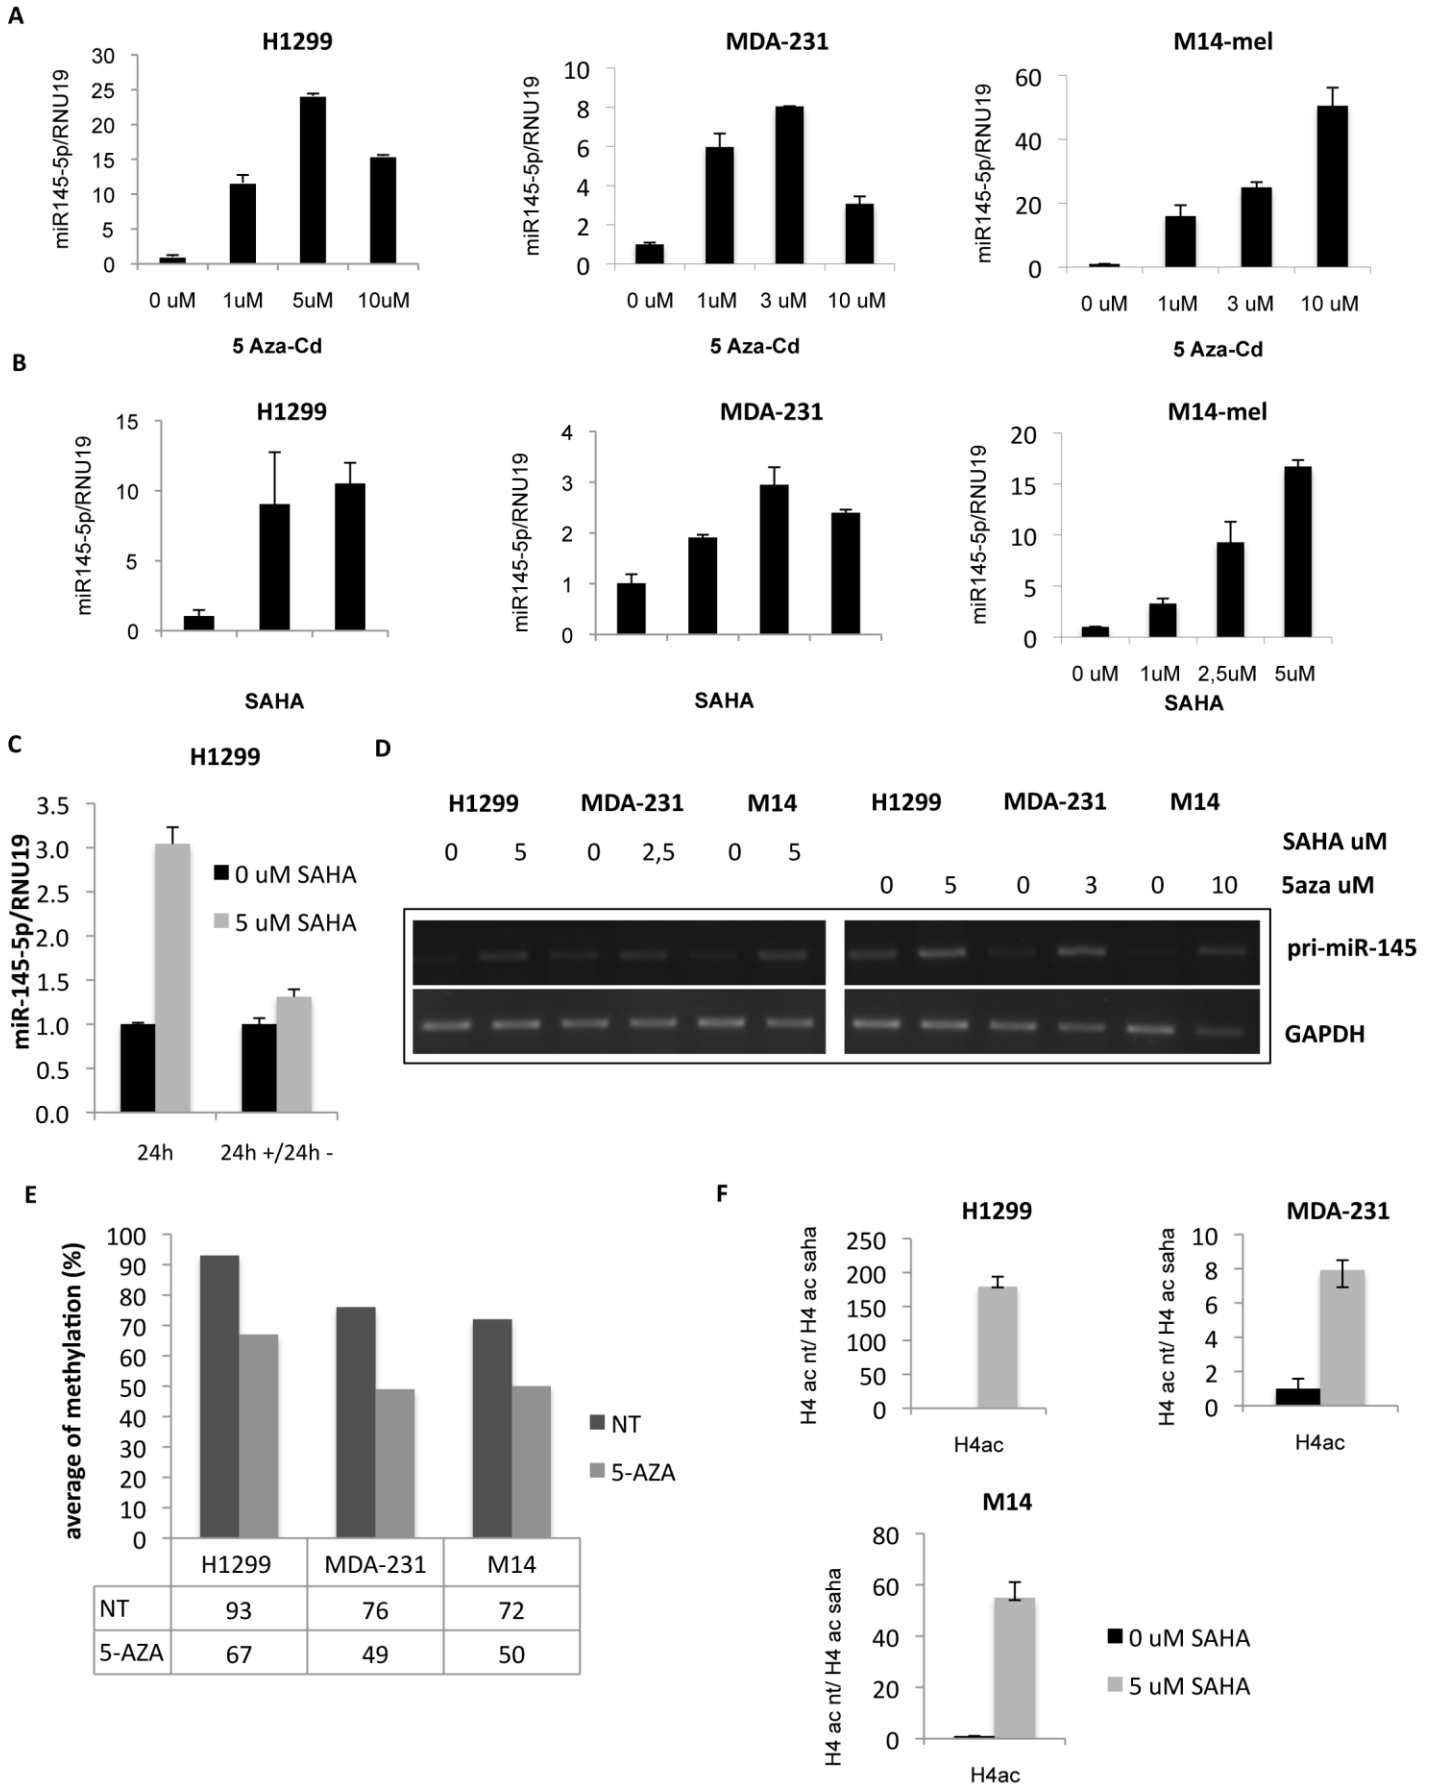

**Supplementary figure S4.**

**A-B)** qRT-PCR of miR-145-5p expression levels in 3 different cell lines representative of the casuistry (H1299, MDA-231, M14) upon 5-azacytidine (5-aza-cd) and vorinostat (SAHA) treatments at the indicated doses. **C)** qRT-PCR of miR-145-5p expression levels in H1299 cells upon 24 hours of 5uM vorinostat (SAHA) treatment and after 24 hours without SAHA in the medium **D)** RT-PCR analysis of pre-miR-145-5p expression levels in 3 different cell lines representative of the casuistry (H1299, MDA-231, M14) upon 5-azacytidine (5-aza-cd) and vorinostat (SAHA) treatments at the indicated doses. **E)** Pyrosequencing analysis of miR-145-5p CpG island methylation status in cancer cell lines treated with 5-azacytidine . **F)** ChIP analysis of acetylated histone H4 occupancy on miR-145-5p regulatory regions in 3 different cancer cell lines upon treatment with 5uM SAHA.

1

2

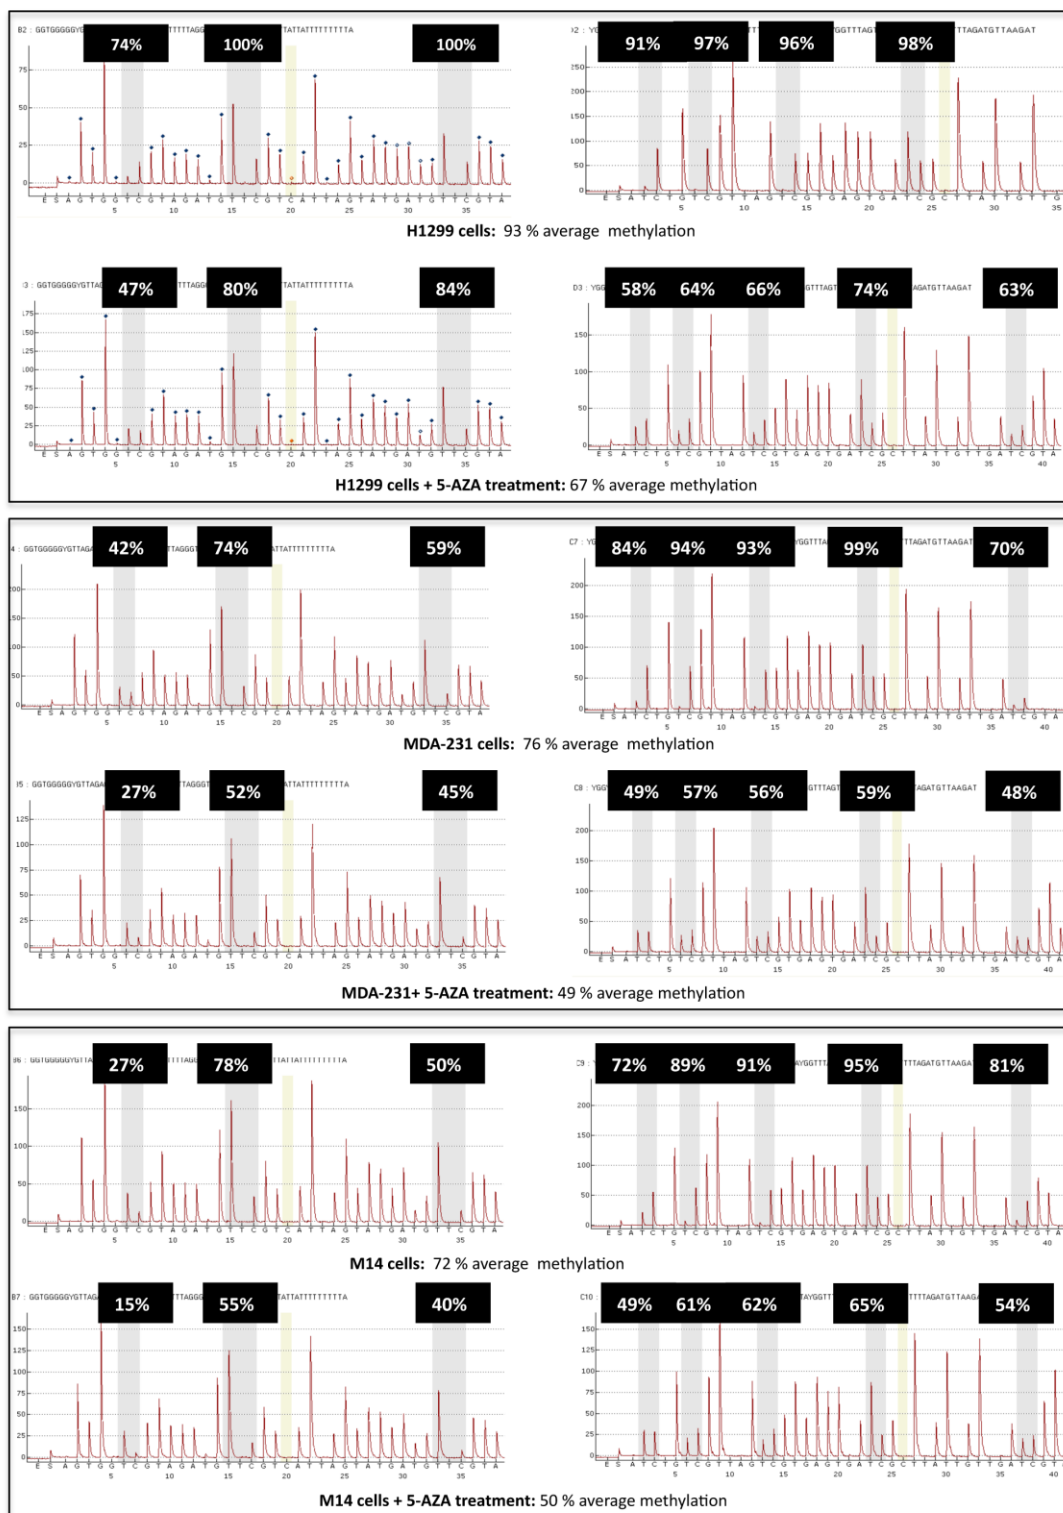

### Supplementary figure S5.

Pyrosequencing analysis of miR-145-5p CpG islands 1 and 2 methylation status in 3 cancer cell lines representative of the casuistry (H1299, MDA-231 and M14) treated with 5 uM 5-azacytidine (1= region 1; 2= region 2).

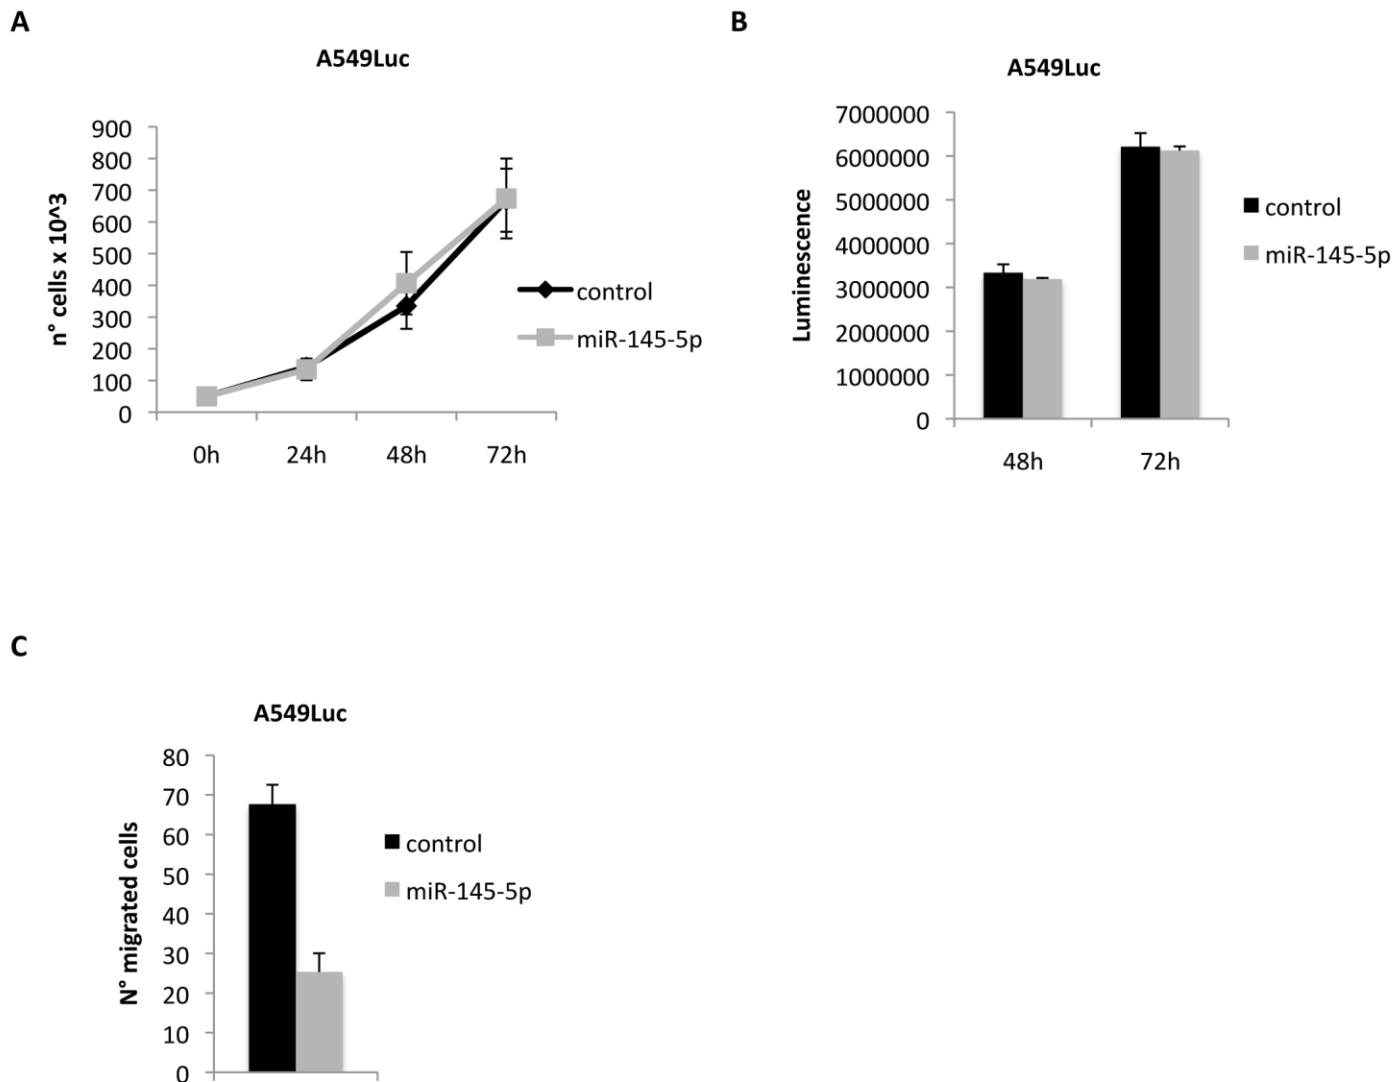

**Supplementary figure S6.**

**A)** Proliferation assay in A549 cells transiently transfected with miR-145-5p mimic or control mimic. **B)** Viability assay in A549 cells transiently transfected with miR-145-5p mimic or control mimic. **C)** Transwell migration assay in A549 cells upon miR-145-5p over-expression.

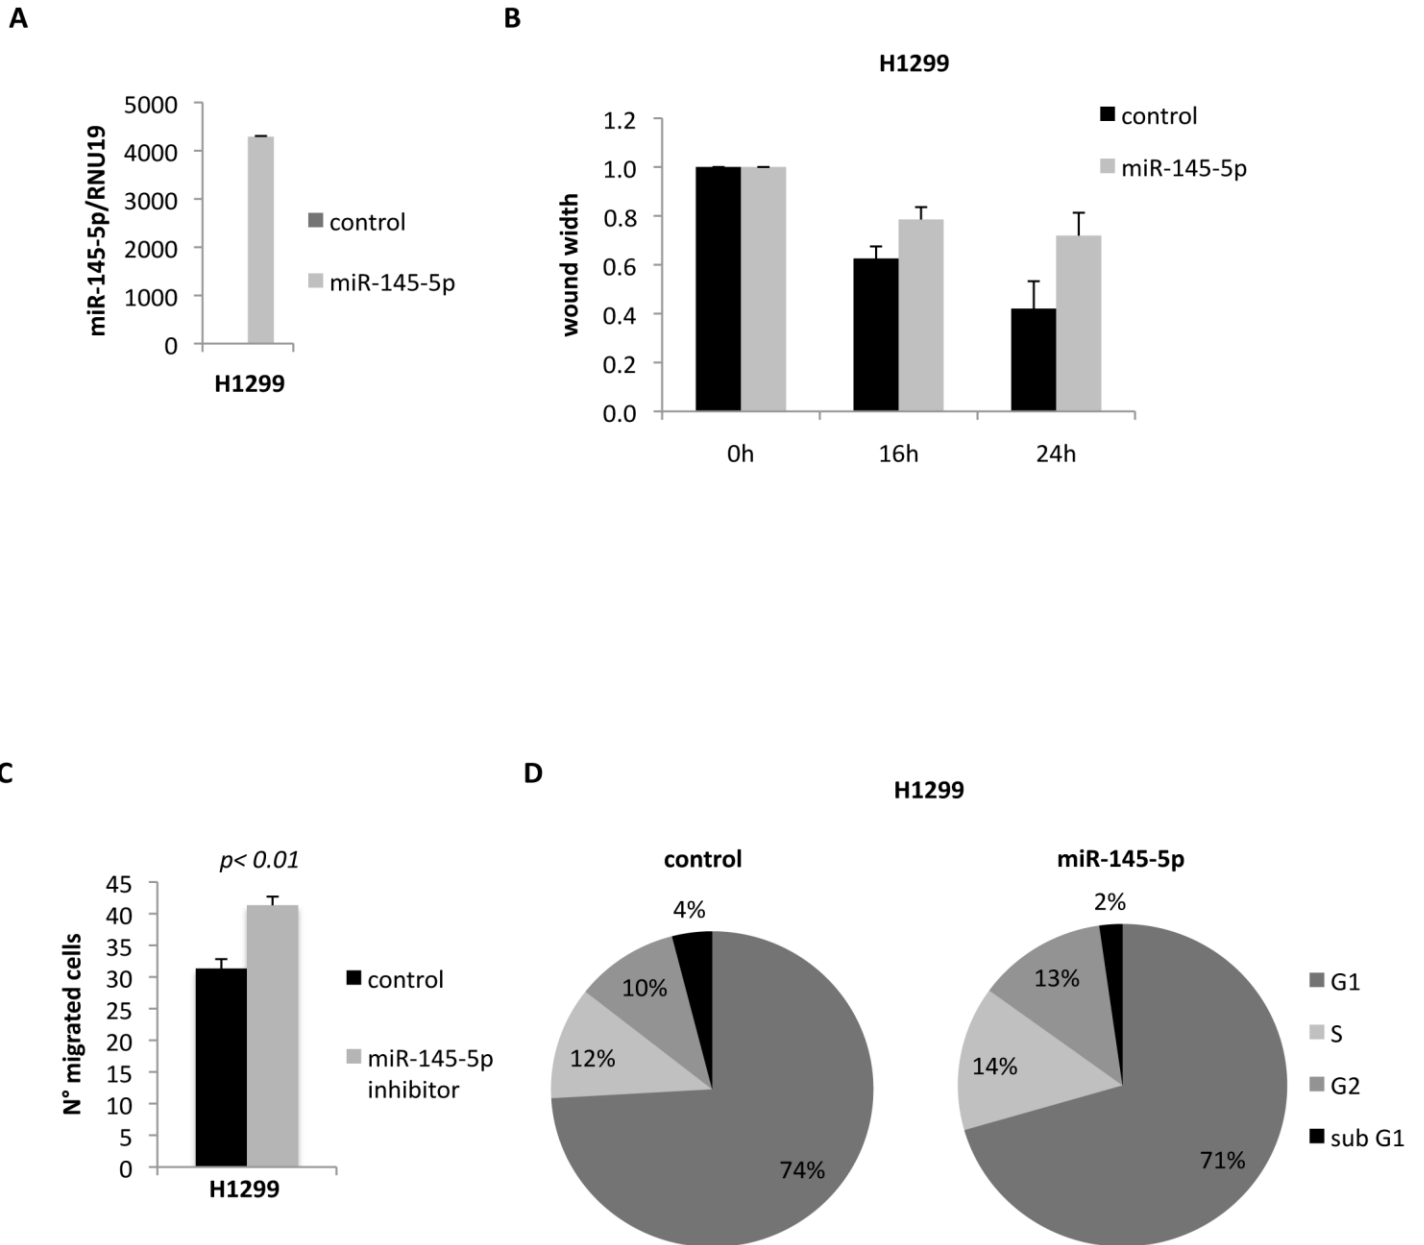

**Supplementary figure S7.**

**A)** qRT-PCR analysis of miR-145-5p expression levels in H1299 cells transiently transfected with miR-145-5p mimic or control mimic. **B)** Quantification of wound healing assay in H1299 cells upon miR-145-5p over-expression. **C)** Transwell migration assay in H1299 cells upon miR-145-5p depletion. **D)** FACS analysis performed in H1299 cells after 48 hours of transfection with 5 nM miR-145-5p mimic or control mimic.



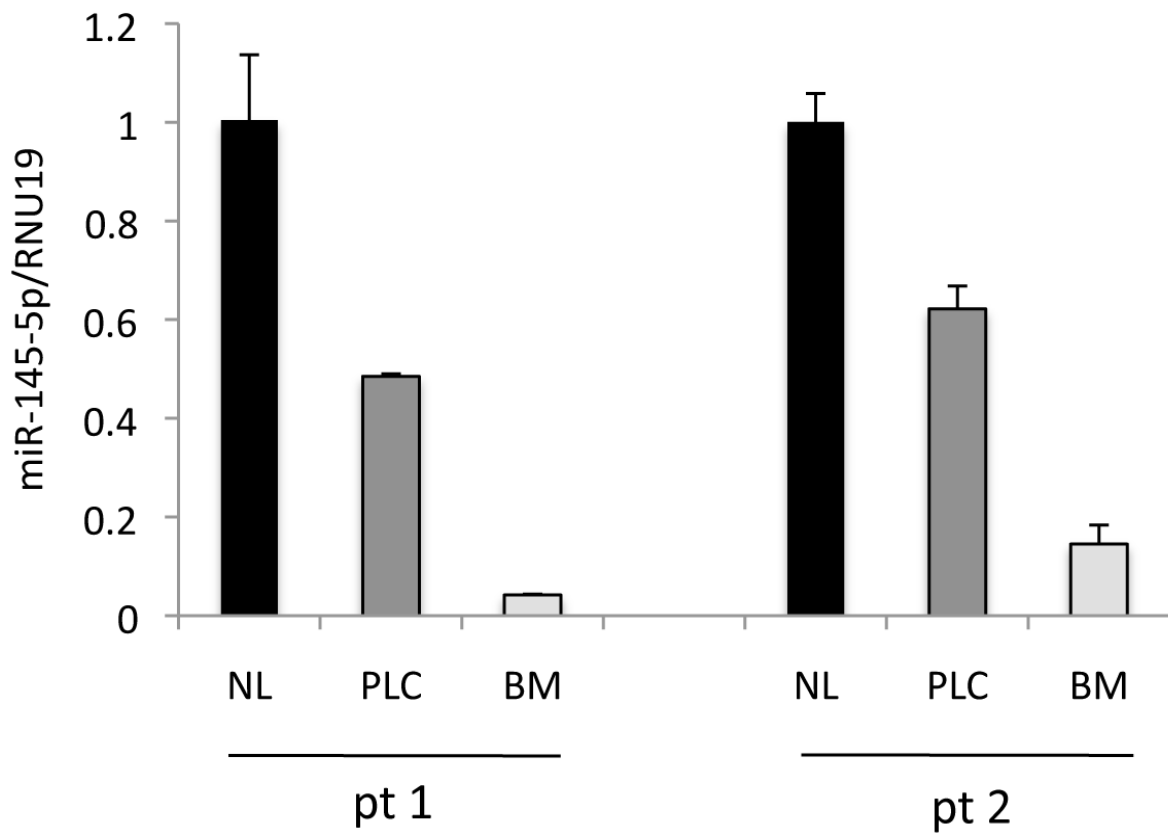

**Supplementary figure S8.**

qRT-PCR of miR-145-5p expression levels in 2 representative patients of the casuistry used for immunohistochemistry assay (NL= normal lung; PLC= primitive lung cancer; BM= brain metastases; pt= patient).

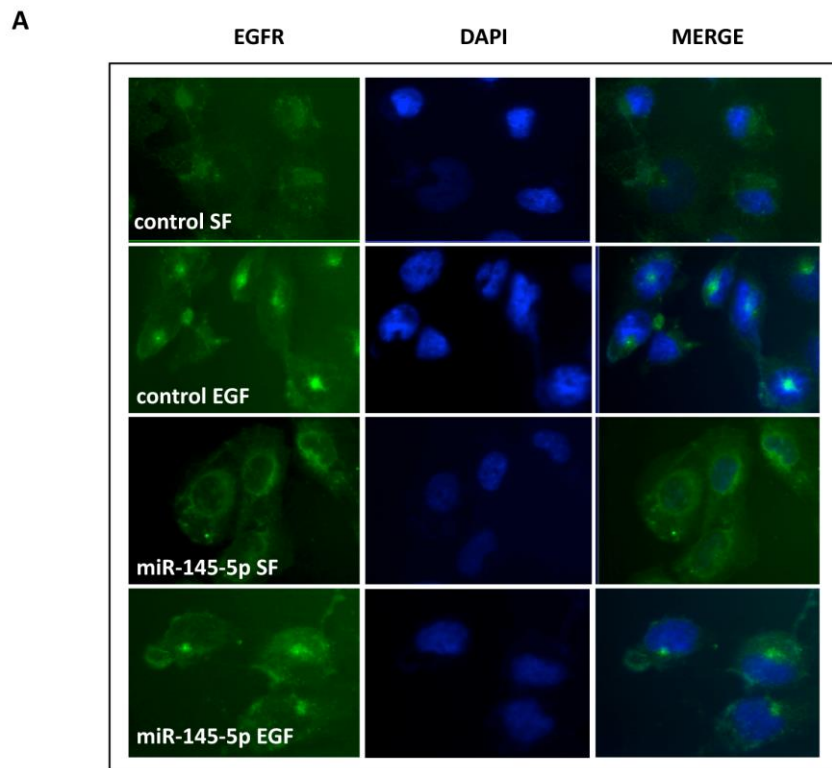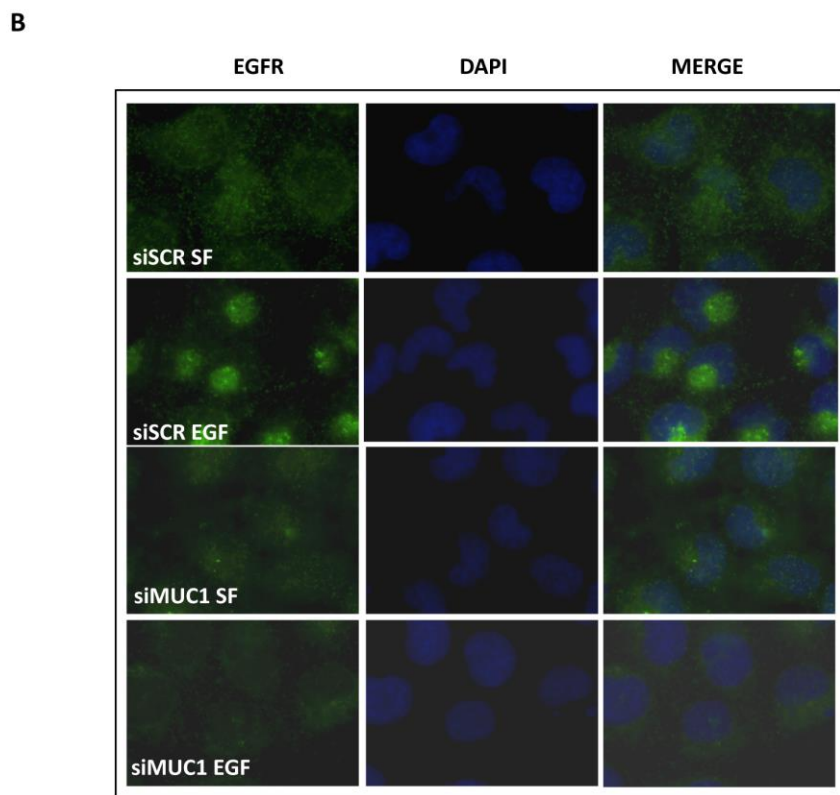

**Supplementary figure S9.**

**A)** Immunofluorescence assay to analyze EGFR localization in H1299 cells treated with EGF (20 ng/mL) upon miR-145-5p over-expression. **B)** Immunofluorescence assay and relative quantification to analyze EGFR localization in H1299 cells treated with EGF (20ng/mL) upon MUC-1 RNA interference.

**A**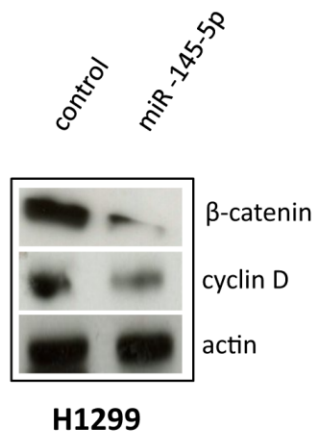**B**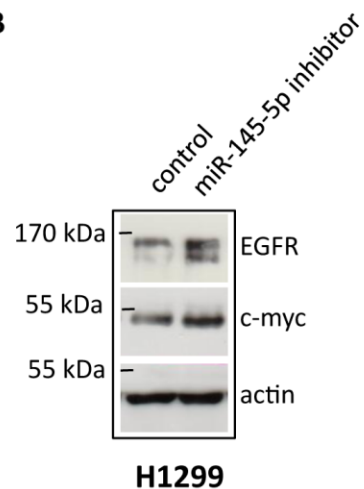**C**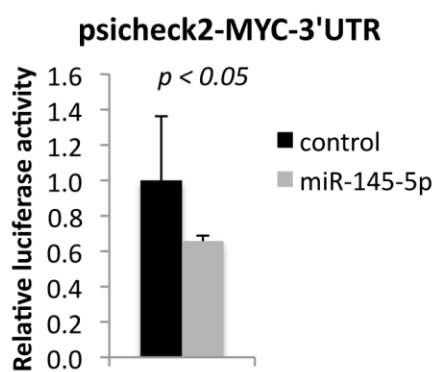**D**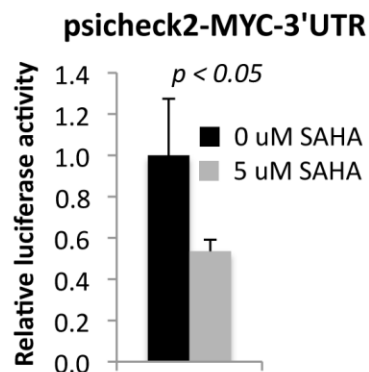**Supplementary figure S10.**

**A)** Western-blot analysis of  $\beta$ -catenin and cyclin-D1 proteins expression levels in H1299 cells upon miR-145-5p over-expression. **B)** Western-blot analysis of EGFR and MYC proteins expression levels in H1299 cells upon miR-145-5p depletion. **C)** Renilla luciferase activity of MYC-3'UTR reporter gene in H1299 transiently transfected with miR-145-5p mimic or control mimic. **D)** Renilla luciferase activity of MYC-3'UTR reporter gene in H1299 treated with 5 uM vorinostat (SAHA).

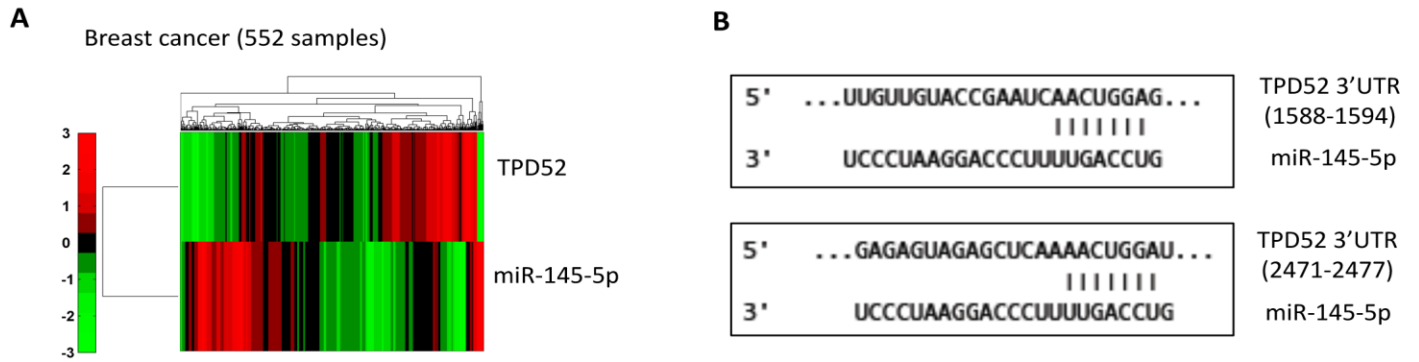

### Supplementary figure S11.

**A)** Heat map of TPD52 and miR-145-5p genes expression in tumoral samples of breast cancer TCGA dataset. **B)** Predicted duplex formation between human TPD52 3' UTR and miR-145-5p.

**Supplementary table 1.** Primers used for RT-PCR .

| Gene        |    | Sequence                         |
|-------------|----|----------------------------------|
| Pri-miR-145 | FW | 5'--- GAGAACTCCAGCTGGTCCTTA---3' |
|             | RV | 5'---GGTGGGAAGGAGGCAAAT---3'     |
| GAPDH       | FW | 5'---GAGTCAACGGATTTGGTCGT---3'   |
|             | RV | 5'---GACAAGCTTCCCGTTCTCAG---3'   |

**Supplementary Table 2.** Primers used for RT-qPCR

| Gene  |    | Sequence                       |
|-------|----|--------------------------------|
| MYC   | FW | 5'---CCTACCCTCTAACGACAGC---3'  |
|       | RV | 5'---CTCTGACCTTTTGCCAGGAG---3' |
| EGFR  | FW | 5'---TCCCTCAGCCACCCATATGT---3' |
|       | RV | 5'---AATGACAAGGTAGCGCTGGG---3' |
| TPD52 | FW | 5'---GCAAGACGTGACAGCAACAT---3' |
|       | RV | 5'---TGGTGATGACTGAGCCAACA---3' |
| GAPDH | FW | 5'---GAGTCAACGGATTTGGTCGT---3' |
|       | RV | 5'---GACAAGCTTCCCGTTCTCAG---3' |

**Supplementary Table 3.** Primers used for RT-qPCR in MeDIP experiment

| Gene               |    | Sequence                        |
|--------------------|----|---------------------------------|
| miR 145 CpG island | FW | 5'---GAGAACTCCAGCTGGTCCTTA---3' |
|                    | RV | 5'--- GGTGGGAAGGAGGCAAAT---3'   |

**Supplementary Table 4.** Primers used for PCR reaction and sequencing analysis

| MiR 145 Region1 a        |    | Sequence                            |
|--------------------------|----|-------------------------------------|
| Primer for amplification | FW | 5'GGAGATTGGGGAATATATATGAGT          |
|                          | RV | Biot 5'-TTCTACATCCAACCCCATCTATAACA  |
|                          |    |                                     |
| Primer for sequencing    | S1 | Fwd 5' GAGGGTAGTTTTGGG              |
| MiR 145 Region1 b        |    | Sequence                            |
| Primer for amplification | FW | 5'TGGGGTTGGATGTAGAAGAGAATT          |
|                          | RV | Biot 5'-TATTTCCAAAAATCCCCATCTTAACAT |
|                          |    |                                     |
| Primer for sequencing    | S1 | Fwd 5'ATTTTAGTTGGTTTTTAGGGATA       |

**Supplementary Table 5.** Primer used for ChIP assay

|                  |    | Sequence                        |
|------------------|----|---------------------------------|
| miR-145-promoter | FW | 5'--- CTTGTGATGCTGGGGAAGTT---3' |
|                  | RV | 5'--- GGGCTCAGAAAGAGAAAGCA---3' |
